# Supplementary material for: Surface reconstructions and relaxation effects in a centre-symmetrical crystal: the {00.1} form of calcite (CaCO3)
Source: Royal Society of Chemistry journal article supplement (doi:10.1039/c002969f), 2010-01-01
Supplement: c002969f.pdf [file c002969f.pdf]

## Supplementary Material

### Surface reconstructions and relaxation effects in a centre-symmetrical crystal: the {00.1} form of calcite (CaCO<sub>3</sub>)

Marco BRUNO, Francesco Roberto MASSARO, Mauro PRENCIPE, Dino AQUILANO  
*Dipartimento di Scienze Mineralogiche e Petrologiche, Università degli Studi di Torino, Via Valperga Caluso 35, I-10125 Torino, Italy*

Table SI. Cell parameters (a and b, in Å) of the (104) and (00.1) slabs, as determined in the optimizations at DFT and empirical level, respectively (see text for details).

|        | a        | b        | θ  |
|--------|----------|----------|----|
| (10.4) | 5,026872 | 8,129833 | 90 |
| (00.1) | 9,962826 | 9,962826 | 60 |

Table SII. Atomic coordinates (x and y, fractional coordinates; z, absolute coordinates in Å) of the (10.4) slab of calcite (CaCO<sub>3</sub>), as determined in the optimization at DFT level (see text for details).

|    | (10.4)    |           |          |
|----|-----------|-----------|----------|
|    | x         | y         | z        |
| O  | 0,394090  | -0,199693 | 8,454984 |
| O  | 0,105910  | 0,300307  | 8,454984 |
| Ca | -0,254102 | -0,046956 | 7,632474 |
| Ca | -0,245898 | 0,453044  | 7,632474 |
| C  | 0,253718  | -0,296677 | 7,751071 |
| C  | 0,246282  | 0,203323  | 7,751071 |
| O  | -0,006191 | -0,295048 | 7,814561 |
| O  | -0,493809 | 0,204952  | 7,814561 |
| O  | 0,367509  | -0,402165 | 6,937074 |
| O  | 0,132491  | 0,097835  | 6,937074 |
| O  | -0,121525 | 0,418236  | 5,397974 |
| O  | -0,378475 | -0,081764 | 5,397974 |
| Ca | 0,252612  | -0,428682 | 4,645805 |
| Ca | 0,247388  | 0,071318  | 4,645805 |
| C  | -0,250809 | 0,320130  | 4,609677 |
| C  | -0,249191 | -0,179870 | 4,609677 |
| O  | 0,492187  | 0,319909  | 4,625348 |
| O  | 0,007813  | -0,180091 | 4,625348 |
| O  | -0,122806 | 0,222625  | 3,819361 |
| O  | -0,377194 | -0,277375 | 3,819361 |
| O  | 0,377154  | 0,037154  | 2,348948 |
| O  | 0,122846  | -0,462846 | 2,348948 |
| Ca | -0,251152 | 0,188122  | 1,532768 |
| Ca | -0,248848 | -0,311878 | 1,532768 |
| C  | 0,250516  | -0,060333 | 1,550091 |
| C  | 0,249484  | 0,439667  | 1,550091 |
| O  | -0,006925 | -0,061323 | 1,541632 |
| O  | -0,493075 | 0,438677  | 1,541632 |

|   |          |           |          |
|---|----------|-----------|----------|
| O | 0,380685 | -0,156703 | 0,753734 |
| O | 0,119315 | 0,343297  | 0,753734 |

Table SIII. Atomic coordinates (x and y, fractional coordinates; z, absolute coordinates in Å) of the (00.1)<sub>RI</sub><sup>Ca</sup> and (00.1)<sub>RI</sub><sup>CO<sub>3</sub></sup> slabs of calcite (CaCO<sub>3</sub>), as determined in the optimization at empirical level (see text for details).

|    | (00.1) <sub>RI</sub> <sup>Ca</sup> |           |            |    | (00.1) <sub>RI</sub> <sup>CO<sub>3</sub></sup> |           |            |
|----|------------------------------------|-----------|------------|----|------------------------------------------------|-----------|------------|
|    | x                                  | y         | z          |    | x                                              | y         | z          |
| Ca | 0,4659945                          | 0,0057022 | -1,2688330 | O  | 0,8711874                                      | 0,6968395 | -1,7323910 |
| Ca | 0,4659958                          | 0,5056986 | -1,2688760 | O  | 0,6798534                                      | 0,9325768 | -1,7710850 |
| O  | 0,2642891                          | 0,2539399 | -1,5914650 | O  | 0,9086394                                      | 0,8957908 | -1,9296590 |
| O  | 0,2329359                          | 0,4928502 | -1,6042670 | C  | 0,8236680                                      | 0,8384558 | -1,7121610 |
| O  | 0,4458998                          | 0,2976030 | -2,1792090 | O  | 0,3712045                                      | 0,6968499 | -1,7324950 |
| C  | 0,3062046                          | 0,3501264 | -1,8069920 | O  | 0,1798510                                      | 0,9325785 | -1,7711250 |
| O  | 0,7390448                          | 0,7963430 | -1,3509690 | O  | 0,4086289                                      | 0,8958167 | -1,9296580 |
| O  | 0,6835084                          | 0,0235318 | -0,8580870 | C  | 0,3236678                                      | 0,8384696 | -1,7122040 |
| O  | 0,9062420                          | 0,8745901 | -1,7888690 | Ca | 0,2019585                                      | 0,1021171 | -3,2598680 |
| C  | 0,7862998                          | 0,8914901 | -1,2599440 | Ca | 0,6475606                                      | 0,7268264 | -2,8844710 |
| O  | 0,2642849                          | 0,7539403 | -1,5913270 | Ca | 0,1475716                                      | 0,7268276 | -2,8845400 |
| O  | 0,2329393                          | 0,9928475 | -1,6041130 | Ca | 0,7019653                                      | 0,1021090 | -3,2598180 |
| O  | 0,4459073                          | 0,7975930 | -2,1788870 | O  | 0,0410389                                      | 0,6009794 | -4,3530950 |
| C  | 0,3062079                          | 0,8501224 | -1,8067710 | O  | 0,1218902                                      | 0,3601129 | -3,9002360 |
| O  | 0,7390413                          | 0,2963356 | -1,3511010 | O  | 0,8724326                                      | 0,5218211 | -4,1619230 |
| O  | 0,6835171                          | 0,5235151 | -0,8580070 | C  | 0,0092117                                      | 0,4959620 | -4,0741900 |
| O  | 0,9062492                          | 0,3745738 | -1,7888220 | O  | 0,4812419                                      | 0,1382171 | -4,4756380 |
| C  | 0,7863040                          | 0,3914755 | -1,2599490 | O  | 0,6425661                                      | 0,8914288 | -4,7044200 |
| Ca | 0,1131516                          | 0,2055363 | -3,0917060 | O  | 0,3948752                                      | 0,9803858 | -4,8830060 |
| Ca | 0,7154220                          | 0,6399309 | -2,9208780 | C  | 0,5062409                                      | 0,0042052 | -4,7459640 |
| Ca | 0,1131481                          | 0,7055542 | -3,0917030 | O  | 0,9812385                                      | 0,1382172 | -4,4756650 |
| Ca | 0,7154165                          | 0,1399314 | -2,9210720 | O  | 0,1425697                                      | 0,8914314 | -4,7044840 |
| O  | 0,9562731                          | 0,6431432 | -4,4000270 | O  | 0,8948791                                      | 0,9803789 | -4,8829700 |
| O  | 0,1403569                          | 0,3995802 | -4,3759530 | C  | 0,0062418                                      | 0,0042038 | -4,7459900 |
| O  | 0,8990272                          | 0,4630408 | -4,5797400 | O  | 0,5410409                                      | 0,6009739 | -4,3531340 |
| C  | 0,0012037                          | 0,5013323 | -4,5144620 | O  | 0,6218933                                      | 0,3601087 | -3,9001990 |
| O  | 0,5547437                          | 0,0861418 | -4,4176950 | O  | 0,3724351                                      | 0,5218174 | -4,1618660 |
| O  | 0,5956217                          | 0,8535453 | -4,5029830 | C  | 0,5092150                                      | 0,4959570 | -4,0741720 |
| O  | 0,3582192                          | 0,0463967 | -4,3512290 | Ca | 0,3053167                                      | 0,3725935 | -5,5834830 |
| C  | 0,5007897                          | 0,9963880 | -4,4143940 | Ca | 0,8663806                                      | 0,7897586 | -6,0248770 |
| O  | 0,9562552                          | 0,1431511 | -4,4000600 | Ca | 0,3663892                                      | 0,7897573 | -6,0248960 |
| O  | 0,1403539                          | 0,8995955 | -4,3760000 | Ca | 0,8053134                                      | 0,3725944 | -5,5835120 |
| O  | 0,8990310                          | 0,9630335 | -4,5798770 | O  | 0,1897116                                      | 0,0310151 | -7,2049800 |
| C  | 0,0011975                          | 0,0013380 | -4,5145500 | O  | 0,0276292                                      | 0,2792657 | -7,0432440 |
| O  | 0,5547486                          | 0,5861424 | -4,4175060 | O  | 0,2730656                                      | 0,1975187 | -7,0959300 |
| O  | 0,5956084                          | 0,3535537 | -4,5031150 | C  | 0,1648900                                      | 0,1668020 | -7,0669340 |
| O  | 0,3582124                          | 0,5464169 | -4,3512740 | O  | 0,6372620                                      | 0,5540170 | -7,2264540 |
| C  | 0,5007853                          | 0,4963966 | -4,4143700 | O  | 0,5544545                                      | 0,7985250 | -7,4284650 |
| Ca | 0,3677260                          | 0,3204682 | -5,6008540 | O  | 0,8038998                                      | 0,6338287 | -7,3244780 |
| Ca | 0,7977818                          | 0,8469226 | -5,9485800 | C  | 0,6664512                                      | 0,6625145 | -7,3828110 |
| Ca | 0,3677334                          | 0,8204522 | -5,6009290 | O  | 0,1372649                                      | 0,5540161 | -7,2264050 |
| Ca | 0,7977736                          | 0,3469471 | -5,9485290 | O  | 0,0544476                                      | 0,7985262 | -7,4284130 |
| O  | 0,1876178                          | 0,0324626 | -7,0263970 | O  | 0,3038951                                      | 0,6338367 | -7,3244690 |

|    |           |           |             |    |           |           |             |
|----|-----------|-----------|-------------|----|-----------|-----------|-------------|
| O  | 0,0324728 | 0,2826705 | -7,1092040  | C  | 0,1664478 | 0,6625178 | -7,3827660  |
| O  | 0,2824987 | 0,1875811 | -7,1080590  | O  | 0,6896998 | 0,0310187 | -7,2049540  |
| C  | 0,1673043 | 0,1676684 | -7,0406290  | O  | 0,5276299 | 0,2792726 | -7,0432370  |
| O  | 0,6451533 | 0,5549301 | -7,3650800  | O  | 0,7730700 | 0,1975096 | -7,0959050  |
| O  | 0,5489846 | 0,8043644 | -7,2718470  | C  | 0,6648877 | 0,1668026 | -7,0669250  |
| O  | 0,7986704 | 0,6524078 | -7,3040520  | Ca | 0,0142332 | 0,4629696 | -8,7091910  |
| C  | 0,6647959 | 0,6699593 | -7,3592310  | Ca | 0,4878123 | 0,0310966 | -8,5039590  |
| O  | 0,1876068 | 0,5324645 | -7,0264940  | Ca | 0,9878221 | 0,0310916 | -8,5039020  |
| O  | 0,0324731 | 0,7826756 | -7,1093000  | Ca | 0,5142218 | 0,4629762 | -8,7092310  |
| O  | 0,2825022 | 0,6875703 | -7,1081870  | O  | 0,3093540 | 0,4715934 | -10,0232000 |
| C  | 0,1673015 | 0,6676675 | -7,0407630  | O  | 0,4741445 | 0,2254186 | -9,9919030  |
| O  | 0,6451928 | 0,0549074 | -7,3651850  | O  | 0,2280039 | 0,3043631 | -10,0872200 |
| O  | 0,5489736 | 0,3043472 | -7,2718690  | C  | 0,3360082 | 0,3346457 | -10,0820500 |
| O  | 0,7986669 | 0,1524355 | -7,3040040  | O  | 0,8631708 | 0,9423618 | -10,0279300 |
| C  | 0,6648056 | 0,1699547 | -7,3592190  | O  | 0,9486257 | 0,6940250 | -9,9561050  |
| Ca | 0,0266728 | 0,4828384 | -8,4805890  | O  | 0,6990901 | 0,8597235 | -9,9677640  |
| Ca | 0,4711762 | 0,0188659 | -8,7110480  | C  | 0,8371620 | 0,8310104 | -9,9388140  |
| Ca | 0,0266668 | 0,9828625 | -8,4804500  | O  | 0,3631618 | 0,9423665 | -10,0280200 |
| Ca | 0,4711857 | 0,5188266 | -8,7111520  | O  | 0,4486314 | 0,6940267 | -9,9561600  |
| O  | 0,3105851 | 0,4666549 | -10,0727000 | O  | 0,1990922 | 0,8597141 | -9,9678040  |
| O  | 0,4677155 | 0,2157508 | -10,0762400 | C  | 0,3371616 | 0,8310092 | -9,9388930  |
| O  | 0,2190586 | 0,3094895 | -10,0061300 | O  | 0,8093627 | 0,4715919 | -10,0231400 |
| C  | 0,3331648 | 0,3308710 | -10,0924400 | O  | 0,9741422 | 0,2254146 | -9,9918630  |
| O  | 0,8539085 | 0,9460401 | -9,9345750  | O  | 0,7279994 | 0,3043716 | -10,0871900 |
| O  | 0,9483530 | 0,6968914 | -9,9698350  | C  | 0,8360082 | 0,3346472 | -10,0819900 |
| O  | 0,6979974 | 0,8507024 | -9,9704230  | Ca | 0,1839807 | 0,1391533 | -11,5124200 |
| C  | 0,8324787 | 0,8318408 | -9,9190330  | Ca | 0,6492373 | 0,6923916 | -11,3156000 |
| O  | 0,3106200 | 0,9666397 | -10,0725900 | Ca | 0,1492207 | 0,6923942 | -11,3156700 |
| O  | 0,4677116 | 0,7157290 | -10,0760600 | Ca | 0,6840005 | 0,1391451 | -11,5123500 |
| O  | 0,2190458 | 0,8095164 | -10,0059900 | O  | 0,8646446 | 0,6171617 | -12,7918200 |
| C  | 0,3331720 | 0,8308659 | -10,0922400 | O  | 0,0132567 | 0,3662457 | -12,7424700 |
| O  | 0,8538733 | 0,4460583 | -9,9345560  | O  | 0,1150789 | 0,5163334 | -12,7406900 |
| O  | 0,9483750 | 0,1968985 | -9,9698940  | C  | 0,9981275 | 0,4993962 | -12,7231300 |
| O  | 0,6980108 | 0,3506638 | -9,9705710  | O  | 0,3812611 | 0,1328906 | -12,8744700 |
| C  | 0,8324795 | 0,3318360 | -9,9191550  | O  | 0,4831480 | 0,8823542 | -12,8920500 |
| Ca | 0,1433727 | 0,1747428 | -11,4929000 | O  | 0,6324614 | 0,9833904 | -12,9362600 |
| Ca | 0,6891733 | 0,6583060 | -11,3360400 | C  | 0,4988697 | 0,0000127 | -12,9390000 |
| Ca | 0,1433358 | 0,6748015 | -11,4927000 | O  | 0,8812719 | 0,1328954 | -12,8745100 |
| Ca | 0,6892037 | 0,1582556 | -11,3363100 | O  | 0,9831313 | 0,8823630 | -12,8921000 |
| O  | 0,8830895 | 0,6336112 | -12,8616100 | O  | 0,1324695 | 0,9833725 | -12,9363100 |
| O  | 0,9844204 | 0,3832394 | -12,9041800 | C  | 0,9988713 | 0,0000108 | -12,9390700 |
| O  | 0,1336266 | 0,4855536 | -12,8585500 | O  | 0,3646386 | 0,6171491 | -12,7917700 |
| C  | 0,0009121 | 0,5003081 | -12,9087800 | O  | 0,5132783 | 0,3662373 | -12,7423500 |
| O  | 0,3665660 | 0,1197324 | -12,7748500 | O  | 0,6150678 | 0,5163534 | -12,7406600 |
| O  | 0,5156781 | 0,8678132 | -12,7647600 | C  | 0,4981286 | 0,4993959 | -12,7230200 |
| O  | 0,6178120 | 0,0162069 | -12,8119700 | Ca | 0,3263362 | 0,3533155 | -14,1557300 |
| C  | 0,4994711 | 0,0014225 | -12,7518600 | Ca | 0,8405284 | 0,8119232 | -14,3247600 |
| O  | 0,8831133 | 0,1336319 | -12,8618000 | Ca | 0,3405584 | 0,8119013 | -14,3246300 |
| O  | 0,9843730 | 0,8832664 | -12,9043100 | Ca | 0,8263042 | 0,3533336 | -14,1558500 |
| O  | 0,1336435 | 0,9855062 | -12,8588300 | O  | 0,1799653 | 0,2859053 | -15,6150900 |
| C  | 0,0009079 | 0,0003104 | -12,9090700 | O  | 0,2870612 | 0,0341454 | -15,6193500 |
| O  | 0,3665495 | 0,6197056 | -12,7746900 | O  | 0,0347562 | 0,1802323 | -15,5920300 |
| O  | 0,5157241 | 0,3677976 | -12,7646300 | C  | 0,1675595 | 0,1660933 | -15,5792800 |
| O  | 0,6177844 | 0,5162576 | -12,8116900 | O  | 0,6551911 | 0,7984356 | -15,7108800 |
| C  | 0,4994731 | 0,5014237 | -12,7515600 | O  | 0,8002047 | 0,5476353 | -15,6793500 |
| Ca | 0,3513597 | 0,3212964 | -14,1723800 | O  | 0,5494067 | 0,6521737 | -15,7286800 |

|    |           |           |             |    |           |           |             |
|----|-----------|-----------|-------------|----|-----------|-----------|-------------|
| Ca | 0,8153113 | 0,8448584 | -14,3133900 | C  | 0,6677229 | 0,6665686 | -15,7373200 |
| Ca | 0,3513835 | 0,8212177 | -14,1727100 | O  | 0,1552152 | 0,7984266 | -15,7107400 |
| Ca | 0,8152795 | 0,3449485 | -14,3130800 | O  | 0,3001932 | 0,5476235 | -15,6792700 |
| O  | 0,1786752 | 0,2855924 | -15,6013400 | O  | 0,0493923 | 0,6521983 | -15,7286400 |
| O  | 0,2873068 | 0,0342539 | -15,6286200 | C  | 0,1677210 | 0,6665709 | -15,7371800 |
| O  | 0,0353623 | 0,1764730 | -15,6201800 | O  | 0,6799325 | 0,2859239 | -15,6152400 |
| C  | 0,1666246 | 0,1657259 | -15,5904900 | O  | 0,7870795 | 0,0341577 | -15,6194600 |
| O  | 0,6549975 | 0,7973415 | -15,7263700 | O  | 0,5347677 | 0,1802021 | -15,5921200 |
| O  | 0,7983080 | 0,5451816 | -15,6995900 | C  | 0,6675592 | 0,1660927 | -15,5794600 |
| O  | 0,5469565 | 0,6541534 | -15,6901700 | Ca | 0,0108731 | 0,4830317 | -17,1328200 |
| C  | 0,6671645 | 0,6655270 | -15,7328800 | Ca | 0,4894681 | 0,0159791 | -17,0143900 |
| O  | 0,1786003 | 0,7856345 | -15,6015000 | Ca | 0,9895160 | 0,0159695 | -17,0142400 |
| O  | 0,2873517 | 0,5342814 | -15,6288100 | Ca | 0,5108240 | 0,4830551 | -17,1330200 |
| O  | 0,0353978 | 0,6763915 | -15,6206200 | O  | 0,3213227 | 0,2133450 | -18,5112600 |
| C  | 0,1666263 | 0,6657239 | -15,5909200 | O  | 0,2118754 | 0,4647140 | -18,5192700 |
| O  | 0,6550759 | 0,2973044 | -15,7261500 | O  | 0,4641012 | 0,3218819 | -18,5459700 |
| O  | 0,7982810 | 0,0451358 | -15,6993900 | C  | 0,3324206 | 0,3337179 | -18,5510200 |
| O  | 0,5469160 | 0,1542297 | -15,6898400 | O  | 0,8432546 | 0,7015765 | -18,4611500 |
| C  | 0,6671699 | 0,1655213 | -15,7324700 | O  | 0,7015621 | 0,9536423 | -18,4734800 |
| Ca | 0,0143617 | 0,4947053 | -17,0246500 | O  | 0,9529591 | 0,8443295 | -18,4454600 |
| Ca | 0,4857102 | 0,0047921 | -17,1312500 | C  | 0,8328409 | 0,8327092 | -18,4355400 |
| Ca | 0,0142838 | 0,9948290 | -17,0241500 | O  | 0,3432011 | 0,7015996 | -18,4614000 |
| Ca | 0,4857945 | 0,5046641 | -17,1317300 | O  | 0,2015802 | 0,9536714 | -18,4736400 |
| O  | 0,3238663 | 0,2124892 | -18,5449700 | O  | 0,4529863 | 0,8442804 | -18,4455400 |
| O  | 0,2125534 | 0,4640838 | -18,5156700 | C  | 0,3328394 | 0,8327102 | -18,4358200 |
| O  | 0,4642134 | 0,3245454 | -18,5251200 | O  | 0,8213605 | 0,2133252 | -18,5110900 |
| C  | 0,3339037 | 0,3333706 | -18,5508700 | O  | 0,7118524 | 0,4647018 | -18,5191800 |
| O  | 0,8430795 | 0,7027120 | -18,4533300 | O  | 0,9640815 | 0,3219220 | -18,5458900 |
| O  | 0,7027609 | 0,9552913 | -18,4707800 | C  | 0,8324166 | 0,3337213 | -18,5508200 |
| O  | 0,9550141 | 0,8424461 | -18,4752000 | Ca | 0,1711409 | 0,1536276 | -19,9595300 |
| C  | 0,8331989 | 0,8336949 | -18,4449600 | Ca | 0,6622396 | 0,6792924 | -19,8639200 |
| O  | 0,3239736 | 0,7124283 | -18,5447600 | Ca | 0,1621638 | 0,6793326 | -19,8641700 |
| O  | 0,2124997 | 0,9640313 | -18,5153600 | Ca | 0,6712072 | 0,1535743 | -19,9592100 |
| O  | 0,4641672 | 0,8246532 | -18,5245300 | O  | 0,0080338 | 0,6221592 | -21,3134800 |
| C  | 0,3339099 | 0,8333642 | -18,5502600 | O  | 0,1228433 | 0,3697852 | -21,3051100 |
| O  | 0,8429720 | 0,2027586 | -18,4536000 | O  | 0,8701778 | 0,5081134 | -21,2916500 |
| O  | 0,7028061 | 0,4553553 | -18,4710800 | C  | 0,0005238 | 0,4996745 | -21,2844100 |
| O  | 0,9550776 | 0,3423301 | -18,4757300 | O  | 0,4925307 | 0,1300308 | -21,3555900 |
| C  | 0,8331960 | 0,3336973 | -18,4455900 | O  | 0,6301785 | 0,8781282 | -21,3539500 |
| Ca | 0,1556846 | 0,1736270 | -19,9579400 | O  | 0,3783698 | 0,9917381 | -21,3776400 |
| Ca | 0,6778838 | 0,6593272 | -19,8755900 | C  | 0,5001037 | 0,0002678 | -21,3821900 |
| Ca | 0,1556170 | 0,6738097 | -19,9572900 | O  | 0,9924834 | 0,1300525 | -21,3559500 |
| Ca | 0,6779399 | 0,1591528 | -19,8762300 | O  | 0,1301994 | 0,8781504 | -21,3541500 |
| O  | 0,9930682 | 0,6291758 | -21,3751000 | O  | 0,8783944 | 0,9916939 | -21,3778200 |
| O  | 0,1298515 | 0,3766479 | -21,3559600 | C  | 0,0001060 | 0,0002665 | -21,3825500 |
| O  | 0,8778264 | 0,4924771 | -21,3542200 | O  | 0,5081039 | 0,6221197 | -21,3131000 |
| C  | 0,0005231 | 0,4993883 | -21,3788600 | O  | 0,6228096 | 0,3697552 | -21,3048100 |
| O  | 0,5072923 | 0,1220992 | -21,3031600 | O  | 0,3701526 | 0,5081742 | -21,2914000 |
| O  | 0,6229455 | 0,8700664 | -21,3215100 | C  | 0,5005256 | 0,4996730 | -21,2839400 |
| O  | 0,3704765 | 0,0062189 | -21,3161000 | Ca | 0,3270246 | 0,3429734 | -22,7165800 |
| C  | 0,4999324 | 0,9996023 | -21,2970800 | Ca | 0,8396663 | 0,8234865 | -22,7906100 |
| O  | 0,9929162 | 0,1292501 | -21,3754600 | Ca | 0,3397648 | 0,8234371 | -22,7901500 |
| O  | 0,1299080 | 0,8767294 | -21,3564500 | Ca | 0,8269205 | 0,3429967 | -22,7169100 |
| O  | 0,8779034 | 0,9923259 | -21,3549600 | O  | 0,1722839 | 0,0373794 | -24,1569100 |
| C  | 0,0005145 | 0,9993977 | -21,3797300 | O  | 0,0373978 | 0,2899405 | -24,1592100 |
| O  | 0,5074422 | 0,6220185 | -21,3028500 | O  | 0,2895370 | 0,1728510 | -24,1448000 |

|    |           |           |             |    |           |           |             |
|----|-----------|-----------|-------------|----|-----------|-----------|-------------|
| O  | 0,6228627 | 0,3700054 | -21,3210000 | C  | 0,1665150 | 0,1664502 | -24,1390100 |
| O  | 0,3704020 | 0,5063823 | -21,3153000 | O  | 0,6603108 | 0,5437056 | -24,1904200 |
| C  | 0,4999307 | 0,4996041 | -21,2961800 | O  | 0,5430597 | 0,7958205 | -24,1940700 |
| Ca | 0,3417416 | 0,3303730 | -22,7266700 | O  | 0,7956490 | 0,6604362 | -24,2089800 |
| Ca | 0,8251746 | 0,8359578 | -22,7900100 | C  | 0,6663109 | 0,6668948 | -24,2129100 |
| Ca | 0,3418929 | 0,8301344 | -22,7276300 | O  | 0,1603860 | 0,5436602 | -24,1900500 |
| Ca | 0,8250077 | 0,3362011 | -22,7890300 | O  | 0,0430109 | 0,7957834 | -24,1941600 |
| O  | 0,1720889 | 0,0377884 | -24,1533700 | O  | 0,2956034 | 0,6605146 | -24,2087700 |
| O  | 0,0379476 | 0,2905178 | -24,1638100 | C  | 0,1663021 | 0,6668933 | -24,2125700 |
| O  | 0,2905474 | 0,1715799 | -24,1659900 | O  | 0,6721835 | 0,0374339 | -24,1574100 |
| C  | 0,1666375 | 0,1667660 | -24,1484700 | O  | 0,5374483 | 0,2900027 | -24,1592900 |
| O  | 0,6615138 | 0,5431372 | -24,2082700 | O  | 0,7895985 | 0,1727528 | -24,1450800 |
| O  | 0,5433675 | 0,7953089 | -24,1938300 | C  | 0,6665201 | 0,1664564 | -24,1395300 |
| O  | 0,7955810 | 0,6616705 | -24,1954600 | Ca | 0,0025276 | 0,4927760 | -25,6236700 |
| C  | 0,6670220 | 0,6665344 | -24,2121500 | Ca | 0,4974259 | 0,0071110 | -25,5715900 |
| O  | 0,1719133 | 0,5378704 | -24,1540400 | Ca | 0,9975729 | 0,0070292 | -25,5712400 |
| O  | 0,0380309 | 0,7906154 | -24,1647000 | Ca | 0,5024051 | 0,4928782 | -25,6242300 |
| O  | 0,2906528 | 0,6713861 | -24,1672500 | O  | 0,3292212 | 0,4617492 | -27,0321500 |
| C  | 0,1666377 | 0,6667689 | -24,1498900 | O  | 0,4616749 | 0,2094668 | -27,0306700 |
| O  | 0,6616991 | 0,0430367 | -24,2077500 | O  | 0,2094107 | 0,3289409 | -27,0435400 |
| O  | 0,5432822 | 0,2952167 | -24,1930300 | C  | 0,3332894 | 0,3335536 | -27,0462500 |
| O  | 0,7954971 | 0,1618551 | -24,1942200 | O  | 0,8375491 | 0,9574735 | -27,0098400 |
| C  | 0,6670316 | 0,1665242 | -24,2108300 | O  | 0,9576792 | 0,7048167 | -27,0079400 |
| Ca | 0,0060562 | 0,4958850 | -25,5803800 | O  | 0,7049415 | 0,8377417 | -26,9987900 |
| Ca | 0,4941303 | 0,0039099 | -25,6231100 | C  | 0,8335148 | 0,8331562 | -26,9949900 |
| Ca | 0,0059489 | 0,9962078 | -25,5792600 | O  | 0,3373853 | 0,9575871 | -27,0101100 |
| Ca | 0,4942563 | 0,5035775 | -25,6243400 | O  | 0,4577602 | 0,7049070 | -27,0079900 |
| O  | 0,3297962 | 0,4612249 | -27,0430600 | O  | 0,2050078 | 0,8376313 | -26,9994000 |
| O  | 0,4614622 | 0,2085952 | -27,0335200 | C  | 0,3335220 | 0,8331796 | -26,9956300 |
| O  | 0,2091403 | 0,3295412 | -27,0331200 | O  | 0,8293521 | 0,4616592 | -27,0319200 |
| C  | 0,3336025 | 0,3331153 | -27,0455300 | O  | 0,9616220 | 0,2093853 | -27,0309500 |
| O  | 0,8370827 | 0,9576263 | -27,0065000 | O  | 0,7093569 | 0,3290157 | -27,0431100 |
| O  | 0,9579927 | 0,7052249 | -27,0148600 | C  | 0,8332843 | 0,3335288 | -27,0459000 |
| O  | 0,7052946 | 0,8366909 | -27,0137600 | Ca | 0,1696572 | 0,1619583 | -28,4610300 |
| C  | 0,8333049 | 0,8332137 | -27,0029800 | Ca | 0,6636689 | 0,6713637 | -28,4255600 |
| O  | 0,3300672 | 0,9610701 | -27,0422300 | Ca | 0,1634600 | 0,6714447 | -28,4259300 |
| O  | 0,4613263 | 0,7084322 | -27,0334100 | Ca | 0,6698341 | 0,1618424 | -28,4603600 |
| O  | 0,2089837 | 0,8298186 | -27,0321400 | O  | 0,8724254 | 0,6251773 | -29,8604700 |
| C  | 0,3336017 | 0,8330907 | -27,0441800 | O  | 0,0024133 | 0,3724333 | -29,8587900 |
| O  | 0,8367965 | 0,4577941 | -27,0070000 | O  | 0,1249080 | 0,5026679 | -29,8535800 |
| O  | 0,9581571 | 0,2053725 | -27,0150100 | C  | 0,9999272 | 0,4999787 | -29,8513900 |
| O  | 0,7054524 | 0,3363898 | -27,0148300 | O  | 0,3749109 | 0,1274711 | -29,8726300 |
| C  | 0,8333136 | 0,3332273 | -27,0042700 | O  | 0,4973547 | 0,8750912 | -29,8732600 |
| Ca | 0,1632079 | 0,1676739 | -28,4604100 | O  | 0,6275451 | 0,9973155 | -29,8801400 |
| Ca | 0,6702653 | 0,6655148 | -28,4323500 | C  | 0,4999393 | 0,0000619 | -29,8818100 |
| Ca | 0,1629271 | 0,6680826 | -28,4590500 | O  | 0,8748829 | 0,1275731 | -29,8738700 |
| Ca | 0,6705178 | 0,1651131 | -28,4337100 | O  | 0,9973440 | 0,8751750 | -29,8752900 |
| O  | 0,8747191 | 0,6270281 | -29,8745600 | O  | 0,1275167 | 0,9973958 | -29,8814900 |
| O  | 0,9982458 | 0,3745805 | -29,8778500 | C  | 0,9999002 | 0,0001641 | -29,8835900 |
| O  | 0,1271205 | 0,4983421 | -29,8720600 | O  | 0,3724150 | 0,6250392 | -29,8591500 |
| C  | 0,0001191 | 0,4998842 | -29,8790400 | O  | 0,5024947 | 0,3723223 | -29,8565900 |
| O  | 0,3728392 | 0,1255225 | -29,8631800 | O  | 0,6248994 | 0,5026659 | -29,8525100 |
| O  | 0,5018355 | 0,8727916 | -29,8603600 | C  | 0,4999684 | 0,4998840 | -29,8495100 |
| O  | 0,6255991 | 0,0015549 | -29,8660300 | Ca | 0,3325267 | 0,3357844 | -31,2785800 |
| C  | 0,4999954 | 0,0000506 | -29,8591100 | Ca | 0,8341432 | 0,8308964 | -31,3006800 |
| O  | 0,8748969 | 0,1272063 | -29,8743200 | Ca | 0,3342637 | 0,8306558 | -31,2981800 |

|    |           |           |             |    |           |           |             |
|----|-----------|-----------|-------------|----|-----------|-----------|-------------|
| O  | 0,9979925 | 0,8747363 | -29,8796300 | Ca | 0,8323648 | 0,3359687 | -31,2810600 |
| O  | 0,1273133 | 0,9980105 | -29,8741700 | O  | 0,1677438 | 0,2922676 | -32,7087100 |
| C  | 0,0001274 | 0,9999161 | -29,8811700 | O  | 0,2923925 | 0,0395439 | -32,7096100 |
| O  | 0,3726604 | 0,6253097 | -29,8635200 | O  | 0,0397091 | 0,1676859 | -32,7079200 |
| O  | 0,5021140 | 0,3726189 | -29,8590200 | C  | 0,1666516 | 0,1664588 | -32,7058100 |
| O  | 0,6253943 | 0,5018883 | -29,8637400 | O  | 0,6655888 | 0,7936668 | -32,7170100 |
| C  | 0,4999895 | 0,5000071 | -29,8570800 | O  | 0,7935366 | 0,5412018 | -32,7158700 |
| Ca | 0,3347692 | 0,3326027 | -31,2849300 | O  | 0,5410116 | 0,6656685 | -32,7187600 |
| Ca | 0,8319416 | 0,8340299 | -31,2985500 | C  | 0,6666666 | 0,6668779 | -32,7201300 |
| Ca | 0,3349480 | 0,8320534 | -31,2863000 | O  | 0,1659167 | 0,7931464 | -32,7174300 |
| Ca | 0,8317652 | 0,3345621 | -31,2968600 | O  | 0,2933790 | 0,5407922 | -32,7156700 |
| O  | 0,1671198 | 0,2927383 | -32,7089800 | O  | 0,0408367 | 0,6656001 | -32,7213800 |
| O  | 0,2928241 | 0,0400779 | -32,7108300 | C  | 0,1666065 | 0,6665445 | -32,7203400 |
| O  | 0,0400706 | 0,1671785 | -32,7115300 | O  | 0,6673749 | 0,2928342 | -32,7090900 |
| C  | 0,1666855 | 0,1666193 | -32,7092200 | O  | 0,7925844 | 0,0399796 | -32,7104600 |
| O  | 0,6662179 | 0,7931766 | -32,7196500 | O  | 0,5399243 | 0,1677144 | -32,7046700 |
| O  | 0,7931549 | 0,5406349 | -32,7174200 | C  | 0,6667364 | 0,1668081 | -32,7059900 |
| O  | 0,5407043 | 0,6660958 | -32,7168000 | Ca | 0,0005980 | 0,4989720 | -34,1396700 |
| C  | 0,6666773 | 0,6666816 | -32,7192300 | Ca | 0,4993978 | 0,0010139 | -34,1322700 |

Table SIV. Atomic coordinates (x and y, fractional coordinates; z, absolute coordinates in Å) of the (00.1)<sub>R2</sub><sup>Ca</sup> and (00.1)<sub>R2</sub><sup>CO<sub>3</sub></sup> slabs of calcite (CaCO<sub>3</sub>), as determined in the optimization at empirical level (see text for details).

|    | (00.1) <sub>R2</sub> <sup>Ca</sup> |           |            | (00.1) <sub>R2</sub> <sup>CO<sub>3</sub></sup> |           |           |            |
|----|------------------------------------|-----------|------------|------------------------------------------------|-----------|-----------|------------|
|    | x                                  | y         | z          | x                                              | y         | z         |            |
| Ca | 0,5003560                          | 0,4964350 | -0,7032070 | O                                              | 0,9087300 | 0,4021920 | -1,8050330 |
| O  | 0,3541800                          | 0,1843210 | -1,5064240 | C                                              | 0,8333340 | 0,3333110 | -1,6921860 |
| O  | 0,3539720                          | 0,4017650 | -1,9326740 | O                                              | 0,9022150 | 0,1890350 | -1,8050780 |
| O  | 0,5382510                          | 0,2367880 | -0,8387300 | O                                              | 0,6890580 | 0,4087070 | -1,8050370 |
| C  | 0,4093580                          | 0,2692880 | -1,3647740 | Ca                                             | 0,0960670 | 0,1969720 | -3,2963600 |
| O  | 0,2405560                          | 0,7189900 | -0,7883720 | Ca                                             | 0,7069390 | 0,5960510 | -3,2962730 |
| O  | 0,1899190                          | 0,9557170 | -1,4676440 | Ca                                             | 0,6969930 | 0,2069210 | -3,2963680 |
| O  | 0,3985570                          | 0,7356700 | -1,9970800 | O                                              | 0,9322420 | 0,4312140 | -4,7434840 |
| C  | 0,2712200                          | 0,8148570 | -1,3503950 | O                                              | 0,9216380 | 0,6365850 | -4,0618110 |
| O  | 0,7447320                          | 0,3458710 | -1,8626790 | O                                              | 0,1467030 | 0,4013440 | -4,0807030 |
| O  | 0,7175130                          | 0,5422950 | -0,9141280 | C                                              | 0,0069770 | 0,4955990 | -4,2908900 |
| O  | 0,9564200                          | 0,3598640 | -1,5470680 | O                                              | 0,3552750 | 0,0597390 | -4,1670440 |
| C  | 0,8170610                          | 0,4107320 | -1,3826610 | O                                              | 0,5597550 | 0,0849500 | -4,1670440 |
| Ca | 0,1655800                          | 0,1648570 | -2,6039890 | O                                              | 0,5849670 | 0,8552580 | -4,1670310 |
| Ca | 0,6335870                          | 0,6664250 | -3,0501960 | C                                              | 0,4999990 | 0,9999820 | -4,1099130 |
| Ca | 0,2031450                          | 0,6372540 | -3,0159370 | O                                              | 0,9013580 | 0,9519200 | -4,0808760 |
| Ca | 0,6611000                          | 0,1986250 | -3,0181370 | O                                              | 0,9312260 | 0,1365150 | -4,7435850 |
| O  | 0,9980600                          | 0,6240210 | -3,9774560 | O                                              | 0,1365990 | 0,9417420 | -4,0619900 |
| O  | 0,1146950                          | 0,3738030 | -4,2651160 | C                                              | 0,9956130 | 0,9973910 | -4,2910630 |
| O  | 0,8607940                          | 0,5129190 | -4,2895500 | O                                              | 0,4417580 | 0,4216240 | -4,0618360 |
| C  | 0,9914270                          | 0,5016950 | -4,1444490 | O                                              | 0,4519330 | 0,6466890 | -4,0806940 |
| O  | 0,5046490                          | 0,1305910 | -4,2863890 | O                                              | 0,6365250 | 0,4322300 | -4,7434940 |
| O  | 0,6285320                          | 0,8819420 | -3,9701810 | C                                              | 0,4974040 | 0,5069640 | -4,2909000 |
| O  | 0,3786590                          | 0,0016390 | -4,2360420 | Ca                                             | 0,3537260 | 0,3035330 | -5,5734940 |
| C  | 0,5018370                          | 0,0068130 | -4,1426610 | Ca                                             | 0,8035470 | 0,8426980 | -5,5735800 |
| O  | 0,0077600                          | 0,1163680 | -4,2558870 | Ca                                             | 0,3427300 | 0,8537060 | -5,5735720 |

|    |           |           |             |    |           |           |             |
|----|-----------|-----------|-------------|----|-----------|-----------|-------------|
| O  | 0,1276140 | 0,8624520 | -4,2950660  | Ca | 0,8333260 | 0,3333290 | -6,2920300  |
| O  | 0,8788850 | 0,9945500 | -3,9894070  | O  | 0,0513330 | 0,2842720 | -7,4917860  |
| C  | 0,0060880 | 0,9914200 | -4,1580350  | C  | 0,1742410 | 0,1582210 | -7,3042450  |
| O  | 0,5011060 | 0,6253690 | -4,7733080  | O  | 0,1685430 | 0,0353380 | -7,2020010  |
| O  | 0,6277110 | 0,3740790 | -4,7065790  | O  | 0,3008160 | 0,1549410 | -7,1328050  |
| O  | 0,3758370 | 0,4987880 | -4,7350430  | O  | 0,5442370 | 0,8008100 | -7,1328220  |
| C  | 0,5014610 | 0,4991880 | -4,8034430  | C  | 0,6675190 | 0,6742250 | -7,3042920  |
| Ca | 0,3209710 | 0,3200960 | -5,7738240  | O  | 0,6643560 | 0,5513270 | -7,4918120  |
| Ca | 0,8358160 | 0,8311220 | -5,5137990  | O  | 0,7961120 | 0,6685020 | -7,2020030  |
| Ca | 0,3175790 | 0,8580590 | -5,7861040  | O  | 0,0331050 | 0,7842610 | -6,9087690  |
| Ca | 0,8592310 | 0,3245410 | -5,7635630  | C  | 0,1666670 | 0,6666490 | -6,8601110  |
| O  | 0,0567900 | 0,3040270 | -7,2009390  | O  | 0,1826160 | 0,5330870 | -6,9087630  |
| C  | 0,1668430 | 0,1666980 | -7,2513050  | O  | 0,2842800 | 0,6825970 | -6,9087840  |
| O  | 0,5410720 | 0,7865630 | -7,1300320  | O  | 0,5353570 | 0,2960840 | -7,2019420  |
| C  | 0,6703340 | 0,6635840 | -7,0970580  | C  | 0,6582400 | 0,1675030 | -7,3042380  |
| O  | 0,0359320 | 0,7926960 | -7,0215990  | O  | 0,6549610 | 0,0442080 | -7,1328480  |
| C  | 0,1661340 | 0,6703570 | -7,1028960  | O  | 0,7842890 | 0,1643640 | -7,4917910  |
| O  | 0,5327400 | 0,2861590 | -7,1733550  | Ca | 0,0179660 | 0,5078920 | -8,5266290  |
| C  | 0,6639130 | 0,1665820 | -7,0696430  | Ca | 0,4999940 | 0,9999970 | -8,6889240  |
| O  | 0,1395880 | 0,0566370 | -7,1991990  | Ca | 0,0079160 | 0,9741120 | -8,5265290  |
| O  | 0,3041620 | 0,1393540 | -7,1875020  | Ca | 0,4741220 | 0,5179290 | -8,5266200  |
| O  | 0,6824130 | 0,5322440 | -7,2027000  | O  | 0,3224340 | 0,4646730 | -9,9792870  |
| O  | 0,7917620 | 0,6732300 | -7,0200890  | O  | 0,4677890 | 0,2120330 | -9,9941420  |
| O  | 0,1708020 | 0,5418180 | -7,1307550  | O  | 0,2155830 | 0,3218720 | -9,9640880  |
| O  | 0,2865820 | 0,6803270 | -7,2057690  | C  | 0,3363630 | 0,3318280 | -10,0011380 |
| O  | 0,6737110 | 0,0354580 | -6,9984340  | O  | 0,8219090 | 0,9624970 | -9,9640120  |
| O  | 0,7867220 | 0,1732320 | -7,1078230  | O  | 0,9646780 | 0,7128440 | -9,9792810  |
| Ca | 0,9914760 | 0,5199320 | -8,5792330  | O  | 0,7120350 | 0,8201620 | -9,9940520  |
| Ca | 0,5210180 | 0,9881360 | -8,5587710  | C  | 0,8318420 | 0,8317720 | -10,0010360 |
| Ca | 0,9863360 | 0,9940200 | -8,5682270  | O  | 0,3201810 | 0,9677620 | -9,9940990  |
| Ca | 0,5011850 | 0,4986480 | -8,4793680  | O  | 0,4625120 | 0,7155520 | -9,9640440  |
| O  | 0,3403840 | 0,4548200 | -9,9663420  | O  | 0,2128570 | 0,8224430 | -9,9792580  |
| O  | 0,4552650 | 0,2029940 | -9,9781590  | C  | 0,3317880 | 0,8363460 | -10,0010510 |
| O  | 0,2026110 | 0,3403040 | -9,9176090  | O  | 0,8667260 | 0,4395860 | -10,0031730 |
| C  | 0,3325120 | 0,3325300 | -9,9389290  | O  | 0,9396030 | 0,1936500 | -10,0032160 |
| O  | 0,8087870 | 0,9698970 | -9,9774400  | O  | 0,6936690 | 0,3667080 | -10,0032230 |
| O  | 0,9698020 | 0,7212700 | -9,9825520  | C  | 0,8333330 | 0,3333150 | -9,9525520  |
| O  | 0,7212480 | 0,8089830 | -9,9772220  | Ca | 0,1455140 | 0,1765510 | -11,3625490 |
| C  | 0,8333430 | 0,8333620 | -10,0239170 | Ca | 0,6779020 | 0,6454980 | -11,3624260 |
| O  | 0,3422180 | 0,9562360 | -9,9110750  | Ca | 0,1666560 | 0,6666640 | -11,4992870 |
| O  | 0,4537310 | 0,7041910 | -9,9701020  | Ca | 0,6765950 | 0,1778790 | -11,3625460 |
| O  | 0,2019950 | 0,8440660 | -9,9804730  | O  | 0,8766240 | 0,6289050 | -12,8040970 |
| C  | 0,3324640 | 0,8351810 | -9,9345880  | O  | 0,9943930 | 0,3770150 | -12,8882580 |
| O  | 0,8413820 | 0,4555370 | -9,9957690  | O  | 0,1292400 | 0,4942480 | -12,8371940 |
| O  | 0,9574270 | 0,2029050 | -9,9213630  | C  | 0,0000990 | 0,5003510 | -12,8583120 |
| O  | 0,7052750 | 0,3395990 | -9,9725580  | O  | 0,3661110 | 0,1171540 | -12,7354870 |
| C  | 0,8350630 | 0,3325950 | -9,9498250  | O  | 0,5167180 | 0,8660900 | -12,7355010 |
| Ca | 0,1679360 | 0,1655340 | -11,2923090 | O  | 0,6171750 | 0,0166960 | -12,7355070 |
| Ca | 0,6611140 | 0,6572880 | -11,4114960 | C  | 0,5000010 | 0,9999810 | -12,6969940 |
| Ca | 0,1819430 | 0,6631960 | -11,4048650 | O  | 0,8770450 | 0,1285670 | -12,8883300 |
| Ca | 0,6559590 | 0,1811150 | -11,4153470 | O  | 0,9942440 | 0,8764890 | -12,8373120 |
| O  | 0,0064560 | 0,3709370 | -12,7802200 | O  | 0,1289350 | 0,9944120 | -12,8042080 |
| O  | 0,8717500 | 0,6235550 | -12,7620170 | C  | 0,0003710 | 0,9995140 | -12,8584680 |
| O  | 0,1244280 | 0,5050700 | -12,7836630 | O  | 0,3764940 | 0,6292200 | -12,8372400 |
| C  | 0,0006650 | 0,5001130 | -12,7613980 | O  | 0,4944540 | 0,3766040 | -12,8041140 |
| O  | 0,5028900 | 0,8719700 | -12,7933000 | O  | 0,6285740 | 0,4943750 | -12,8882440 |

|    |           |           |             |    |           |           |             |
|----|-----------|-----------|-------------|----|-----------|-----------|-------------|
| O  | 0,3722110 | 0,1241890 | -12,7807000 | C  | 0,4995320 | 0,5000790 | -12,8583300 |
| O  | 0,6248840 | 0,0027490 | -12,7648320 | Ca | 0,3384610 | 0,3184210 | -14,1975360 |
| C  | 0,5002600 | 0,9995570 | -12,7708380 | Ca | 0,8184290 | 0,8430730 | -14,1976620 |
| O  | 0,0036390 | 0,8723820 | -12,7619340 | Ca | 0,3431160 | 0,8384310 | -14,1976710 |
| O  | 0,8715080 | 0,1251560 | -12,7874400 | Ca | 0,8333270 | 0,3333330 | -14,3415960 |
| O  | 0,1237550 | 0,0048500 | -12,7843580 | O  | 0,1633090 | 0,2947320 | -15,6610310 |
| C  | 0,9995170 | 0,0006530 | -12,7670780 | O  | 0,2957200 | 0,0428860 | -15,6685950 |
| O  | 0,4879590 | 0,3803760 | -12,8756700 | O  | 0,0431680 | 0,1621370 | -15,6953820 |
| O  | 0,3804810 | 0,6318510 | -12,8764580 | C  | 0,1669990 | 0,1666910 | -15,6865370 |
| O  | 0,6319140 | 0,4879630 | -12,8746240 | O  | 0,6613450 | 0,7957160 | -15,6686510 |
| C  | 0,5001480 | 0,5000140 | -12,9087480 | O  | 0,7946870 | 0,5431660 | -15,6954870 |
| Ca | 0,3247320 | 0,3304580 | -14,2428160 | O  | 0,5419520 | 0,6632640 | -15,6611450 |
| Ca | 0,8341890 | 0,8323270 | -14,1539430 | C  | 0,6662880 | 0,6669830 | -15,6866940 |
| Ca | 0,3292090 | 0,8448470 | -14,2502140 | O  | 0,1794040 | 0,7861530 | -15,5912160 |
| Ca | 0,8455870 | 0,3259500 | -14,2402780 | O  | 0,2861710 | 0,5344040 | -15,5912290 |
| O  | 0,1554550 | 0,2981900 | -15,6851800 | O  | 0,0344230 | 0,6793850 | -15,5912510 |
| O  | 0,2982270 | 0,0465370 | -15,6842090 | C  | 0,1666660 | 0,6666480 | -15,5597750 |
| O  | 0,0465820 | 0,1554510 | -15,6833910 | O  | 0,6621550 | 0,2946560 | -15,6954070 |
| C  | 0,1667750 | 0,1667100 | -15,7113390 | O  | 0,7947510 | 0,0419180 | -15,6610360 |
| O  | 0,6701730 | 0,7912460 | -15,6186070 | O  | 0,5429040 | 0,1613560 | -15,6685500 |
| O  | 0,7912410 | 0,5390140 | -15,6418540 | C  | 0,6667100 | 0,1662690 | -15,6865300 |
| O  | 0,5382340 | 0,6707520 | -15,6309020 | Ca | 0,0042820 | 0,5075090 | -17,0520790 |
| C  | 0,6664320 | 0,6667480 | -15,6216250 | Ca | 0,4999870 | 0,0000020 | -17,1372990 |
| O  | 0,1694480 | 0,7914240 | -15,6438550 | Ca | 0,0075350 | 0,9881840 | -17,0519270 |
| O  | 0,2914770 | 0,5383700 | -15,6310390 | Ca | 0,4881970 | 0,5042290 | -17,0520770 |
| O  | 0,0390880 | 0,6695220 | -15,6220750 | O  | 0,4614070 | 0,3295200 | -18,4907810 |
| C  | 0,1670550 | 0,6663550 | -15,6248680 | C  | 0,3334910 | 0,3329330 | -18,5143140 |
| O  | 0,6717120 | 0,2906890 | -15,6249390 | O  | 0,3294160 | 0,2088270 | -18,5138060 |
| O  | 0,7908690 | 0,0383360 | -15,6160700 | O  | 0,2094550 | 0,4614690 | -18,5103660 |
| O  | 0,5386390 | 0,1707660 | -15,6352230 | O  | 0,9614730 | 0,8290700 | -18,5102470 |
| C  | 0,6667870 | 0,1669720 | -15,6142540 | C  | 0,8329530 | 0,8335370 | -18,5141250 |
| Ca | 0,9939930 | 0,5089780 | -17,0847340 | O  | 0,8295720 | 0,7090190 | -18,4906580 |
| Ca | 0,5094530 | 0,9973270 | -17,0771490 | O  | 0,7088310 | 0,9617040 | -18,5137090 |
| Ca | 0,9961480 | 0,9945640 | -17,0798960 | O  | 0,4617240 | 0,8294280 | -18,5136610 |
| Ca | 0,5008230 | 0,4993030 | -17,0160970 | C  | 0,3335580 | 0,8334710 | -18,5141130 |
| O  | 0,3363650 | 0,2054330 | -18,4696210 | O  | 0,3290900 | 0,7094190 | -18,5102800 |
| O  | 0,2057640 | 0,4583140 | -18,4870130 | O  | 0,2090390 | 0,9613710 | -18,4906460 |
| O  | 0,4581570 | 0,3361200 | -18,4745260 | O  | 0,9535220 | 0,3448530 | -18,4619410 |
| C  | 0,3332420 | 0,3332330 | -18,4700740 | C  | 0,8333340 | 0,3333140 | -18,4360190 |
| O  | 0,8242790 | 0,7119710 | -18,5158100 | O  | 0,8448750 | 0,2015850 | -18,4619150 |
| O  | 0,7121000 | 0,9639230 | -18,5142480 | O  | 0,7016060 | 0,4535020 | -18,4618930 |
| O  | 0,9640050 | 0,8242050 | -18,5136720 | Ca | 0,1576110 | 0,1723750 | -19,8979920 |
| C  | 0,8334660 | 0,8333440 | -18,5365000 | Ca | 0,6699700 | 0,6576070 | -19,8978140 |
| O  | 0,3371430 | 0,7054500 | -18,4722270 | Ca | 0,1666590 | 0,6666720 | -19,9655000 |
| O  | 0,2051570 | 0,9579570 | -18,4680560 | Ca | 0,6724270 | 0,1699350 | -19,8980020 |
| O  | 0,4579970 | 0,8369360 | -18,4838680 | O  | 0,8752580 | 0,4971050 | -21,3531900 |
| C  | 0,3333420 | 0,8336880 | -18,4658160 | O  | 0,9971930 | 0,6277520 | -21,3506990 |
| O  | 0,8359400 | 0,2057990 | -18,4890180 | O  | 0,1274750 | 0,3750650 | -21,3357100 |
| O  | 0,7060860 | 0,4581450 | -18,4755440 | C  | 0,0000470 | 0,5001210 | -21,3535120 |
| O  | 0,9586140 | 0,3360020 | -18,4728350 | O  | 0,3697810 | 0,0081040 | -21,3060590 |
| C  | 0,8338010 | 0,3331580 | -18,4730280 | O  | 0,5081240 | 0,1220760 | -21,3060260 |
| Ca | 0,1671350 | 0,1660780 | -19,8690730 | O  | 0,6220950 | 0,8697600 | -21,3060190 |
| Ca | 0,6615260 | 0,6648050 | -19,9208270 | C  | 0,5000000 | 0,9999810 | -21,2861160 |
| Ca | 0,1741340 | 0,6621900 | -19,9193280 | O  | 0,8751040 | 0,9973820 | -21,3358580 |
| Ca | 0,6642550 | 0,1736810 | -19,9243250 | O  | 0,9970850 | 0,1276180 | -21,3533380 |
| O  | 0,0027860 | 0,6250420 | -21,3158330 | O  | 0,1277890 | 0,8750340 | -21,3508110 |



|    |           |           |             |    |           |           |             |
|----|-----------|-----------|-------------|----|-----------|-----------|-------------|
| O  | 0,1249230 | 0,3724890 | -21,3187780 | C  | 0,0001400 | 0,9997930 | -21,3537440 |
| O  | 0,8724830 | 0,5025400 | -21,3276070 | O  | 0,3750340 | 0,4971720 | -21,3506460 |
| C  | 0,9999490 | 0,5001990 | -21,3140540 | O  | 0,4974360 | 0,6274570 | -21,3356780 |
| O  | 0,5018170 | 0,1254920 | -21,3306640 | O  | 0,6276190 | 0,3752400 | -21,3532380 |
| O  | 0,6254940 | 0,8726710 | -21,3183500 | C  | 0,4998110 | 0,5000270 | -21,3535040 |
| O  | 0,3729510 | 0,0019120 | -21,3217340 | Ca | 0,3376090 | 0,3266660 | -22,7447540 |
| C  | 0,5002700 | 0,9999700 | -21,3189110 | Ca | 0,8266760 | 0,8356660 | -22,7449660 |
| O  | 0,0021760 | 0,1251580 | -21,3198520 | Ca | 0,3357330 | 0,8375800 | -22,7449550 |
| O  | 0,1254620 | 0,8727360 | -21,3297730 | Ca | 0,8333160 | 0,3333430 | -22,7965730 |
| O  | 0,8726490 | 0,0021030 | -21,3183250 | O  | 0,0413340 | 0,2939450 | -24,1914610 |
| C  | 0,0000140 | 0,9998940 | -21,3174140 | C  | 0,1665540 | 0,1667070 | -24,1921410 |
| O  | 0,4934760 | 0,6294200 | -21,3570670 | O  | 0,1648950 | 0,0412710 | -24,1800020 |
| O  | 0,6294940 | 0,3771830 | -21,3567620 | O  | 0,2939540 | 0,1645120 | -24,1900550 |
| O  | 0,3772690 | 0,4934230 | -21,3557200 | O  | 0,5415390 | 0,7939590 | -24,1901800 |
| C  | 0,5000940 | 0,4999980 | -21,3732300 | C  | 0,6667180 | 0,6665340 | -24,1923630 |
| Ca | 0,3311910 | 0,3300760 | -22,7627070 | O  | 0,6646530 | 0,5413390 | -24,1915110 |
| Ca | 0,8337450 | 0,8329660 | -22,7233520 | O  | 0,7938380 | 0,6648270 | -24,1801640 |
| Ca | 0,3298530 | 0,8385960 | -22,7653470 | O  | 0,0375060 | 0,7899940 | -24,1576690 |
| Ca | 0,8388420 | 0,3317720 | -22,7618770 | C  | 0,1666660 | 0,6666480 | -24,1432390 |
| O  | 0,0430200 | 0,2953140 | -24,1946260 | O  | 0,1724810 | 0,5374870 | -24,1576680 |
| C  | 0,1667370 | 0,1666680 | -24,2068310 | O  | 0,2900130 | 0,6724600 | -24,1576920 |
| O  | 0,5397140 | 0,7922890 | -24,1754510 | O  | 0,5412940 | 0,2937910 | -24,1799870 |
| C  | 0,6666520 | 0,6666230 | -24,1663280 | C  | 0,6667310 | 0,1666970 | -24,1921270 |
| O  | 0,0397880 | 0,7921950 | -24,1679630 | O  | 0,6645350 | 0,0414930 | -24,1901360 |
| C  | 0,1668780 | 0,6666040 | -24,1672810 | O  | 0,7939680 | 0,1646810 | -24,1913680 |
| O  | 0,5393500 | 0,2920500 | -24,1664990 | Ca | 0,0029690 | 0,5016030 | -25,5932370 |
| C  | 0,6666730 | 0,1668180 | -24,1640780 | Ca | 0,4999890 | 0,0000130 | -25,6274160 |
| O  | 0,1618170 | 0,0429510 | -24,1948300 | Ca | 0,0016440 | 0,9954020 | -25,5929930 |
| O  | 0,2953660 | 0,1617700 | -24,1937470 | Ca | 0,4953980 | 0,5029030 | -25,5931910 |
| O  | 0,6683640 | 0,5394900 | -24,1674250 | O  | 0,3318840 | 0,4602720 | -27,0312940 |
| O  | 0,7922220 | 0,6681730 | -24,1677910 | O  | 0,4602740 | 0,2076360 | -27,0311490 |
| O  | 0,1680570 | 0,5397090 | -24,1762280 | O  | 0,2076520 | 0,3321090 | -27,0241540 |
| O  | 0,2923460 | 0,6682170 | -24,1683580 | C  | 0,3333650 | 0,3332320 | -27,0322090 |
| O  | 0,6686470 | 0,0394880 | -24,1663430 | O  | 0,8321830 | 0,9601730 | -27,0239780 |
| O  | 0,7921450 | 0,1684880 | -24,1739380 | O  | 0,9602710 | 0,7077780 | -27,0311450 |
| Ca | 0,9987000 | 0,5038140 | -25,6070380 | O  | 0,7076350 | 0,8320980 | -27,0308840 |
| Ca | 0,5039840 | 0,9975910 | -25,6050230 | C  | 0,8332560 | 0,8333610 | -27,0318800 |
| Ca | 0,9973120 | 0,9989040 | -25,6055920 | O  | 0,3321050 | 0,9602360 | -27,0308540 |
| Ca | 0,5001760 | 0,4997790 | -25,5778370 | O  | 0,4601970 | 0,7076120 | -27,0237770 |
| O  | 0,3344100 | 0,4590760 | -27,0160280 | O  | 0,2078010 | 0,8319070 | -27,0310420 |
| O  | 0,4591780 | 0,2065350 | -27,0216870 | C  | 0,3333810 | 0,8333460 | -27,0317650 |
| O  | 0,2064290 | 0,3344820 | -27,0158980 | O  | 0,8370930 | 0,4577440 | -27,0096810 |
| C  | 0,3333140 | 0,3332900 | -27,0151540 | O  | 0,9577640 | 0,2051180 | -27,0098160 |
| O  | 0,8299380 | 0,9612970 | -27,0340910 | O  | 0,7051410 | 0,3370680 | -27,0096820 |
| O  | 0,9612870 | 0,7088430 | -27,0337380 | C  | 0,8333320 | 0,3333130 | -27,0002490 |
| O  | 0,7088400 | 0,8299530 | -27,0335890 | Ca | 0,1640150 | 0,1675150 | -28,4410010 |
| C  | 0,8333600 | 0,8333610 | -27,0423960 | Ca | 0,6684070 | 0,6640060 | -28,4406290 |
| O  | 0,3346830 | 0,9590730 | -27,0150710 | Ca | 0,1666440 | 0,6666850 | -28,4620550 |
| O  | 0,4589910 | 0,7064950 | -27,0155340 | Ca | 0,6676040 | 0,1683800 | -28,4409650 |
| O  | 0,2064330 | 0,8345690 | -27,0209950 | O  | 0,8740460 | 0,6265500 | -29,8685360 |
| C  | 0,3332940 | 0,8334730 | -27,0140260 | O  | 0,9993200 | 0,3740900 | -29,8706950 |
| O  | 0,8343610 | 0,4591750 | -27,0220400 | O  | 0,1266440 | 0,4994020 | -29,8727200 |
| O  | 0,9591510 | 0,2064260 | -27,0163900 | C  | 0,0000750 | 0,5000080 | -29,8722210 |
| O  | 0,7065950 | 0,3343890 | -27,0170680 | O  | 0,3726780 | 0,1253750 | -29,8623030 |
| C  | 0,8334650 | 0,3333170 | -27,0159180 | O  | 0,5019260 | 0,8726930 | -29,8618550 |
| Ca | 0,1667500 | 0,1666210 | -28,4313670 | O  | 0,6253650 | 0,0019340 | -29,8624630 |

|    |           |           |             |    |           |           |             |
|----|-----------|-----------|-------------|----|-----------|-----------|-------------|
| Ca | 0,6657590 | 0,6651270 | -28,4491080 | C  | 0,4999880 | 0,0000040 | -29,8575280 |
| Ca | 0,1691510 | 0,6659000 | -28,4489380 | O  | 0,8741340 | 0,1265640 | -29,8710260 |
| Ca | 0,6650500 | 0,1691350 | -28,4498430 | O  | 0,9993500 | 0,8739300 | -29,8730740 |
| O  | 0,0006230 | 0,3734280 | -29,8650360 | O  | 0,1265890 | 0,9992940 | -29,8687800 |
| O  | 0,8733310 | 0,6260180 | -29,8638690 | C  | 0,0000210 | 0,9998590 | -29,8726910 |
| O  | 0,1260590 | 0,5005860 | -29,8669310 | O  | 0,3739640 | 0,6266360 | -29,8726170 |
| C  | 0,9999980 | 0,5000740 | -29,8636950 | O  | 0,4993670 | 0,3740370 | -29,8684420 |
| O  | 0,5005470 | 0,8734020 | -29,8671930 | O  | 0,6266020 | 0,4992530 | -29,8701540 |
| O  | 0,3734060 | 0,1259780 | -29,8653100 | C  | 0,4999090 | 0,5000510 | -29,8719810 |
| O  | 0,6259770 | 0,0006940 | -29,8638880 | Ca | 0,3336890 | 0,3323850 | -31,2902080 |
| C  | 0,5000440 | 0,9999620 | -29,8638670 | Ca | 0,8323090 | 0,8338960 | -31,2905920 |
| O  | 0,0006800 | 0,8733540 | -29,8640450 | Ca | 0,3339960 | 0,8336560 | -31,2903730 |
| O  | 0,8733100 | 0,1260520 | -29,8686200 | O  | 0,6664740 | 0,7930040 | -32,7159460 |
| O  | 0,1259100 | 0,0007020 | -29,8650120 | O  | 0,7930910 | 0,5403750 | -32,7133950 |
| C  | 0,9999180 | 0,0000360 | -29,8641960 | O  | 0,5405050 | 0,6664380 | -32,7136630 |
| O  | 0,4980440 | 0,3747610 | -29,8749600 | C  | 0,6667230 | 0,6665790 | -32,7148040 |
| O  | 0,3747190 | 0,6272740 | -29,8747190 | Ca | 0,8333330 | 0,3333330 | -31,2922670 |
| O  | 0,6272220 | 0,4980780 | -29,8747790 | O  | 0,1666670 | 0,2929680 | -32,7146430 |
| C  | 0,4999880 | 0,5000420 | -29,8797060 | O  | 0,2929680 | 0,0403660 | -32,7146430 |
| Ca | 0,3326020 | 0,3329080 | -31,2931880 | O  | 0,0403660 | 0,1666670 | -32,7146430 |
| Ca | 0,8332840 | 0,8334410 | -31,2845480 | C  | 0,1666670 | 0,1666670 | -32,7146430 |
| Ca | 0,3328790 | 0,8345820 | -31,2927920 | O  | 0,1666670 | 0,7929680 | -32,7146430 |
| Ca | 0,8344320 | 0,3326060 | -31,2934150 | O  | 0,2929680 | 0,5403660 | -32,7146430 |
| O  | 0,1661520 | 0,2932010 | -32,7172470 | O  | 0,0403660 | 0,6666670 | -32,7146430 |
| O  | 0,2931460 | 0,0406810 | -32,7173980 | C  | 0,1666670 | 0,6666670 | -32,7146430 |
| O  | 0,0406140 | 0,1662010 | -32,7172450 | O  | 0,6666670 | 0,2929680 | -32,7146430 |
| C  | 0,1666320 | 0,1666970 | -32,7186230 | O  | 0,7929680 | 0,0403660 | -32,7146430 |
| O  | 0,6667290 | 0,7929660 | -32,7112930 | O  | 0,5403660 | 0,1666670 | -32,7146430 |
| O  | 0,7928430 | 0,5402940 | -32,7138010 | C  | 0,6666670 | 0,1666670 | -32,7146430 |
| O  | 0,5401860 | 0,6669530 | -32,7115900 | Ca | 0,0000000 | 0,5000000 | -34,1370190 |
| C  | 0,6666270 | 0,6667040 | -32,7118000 | Ca | 0,5000000 | 0,0000000 | -34,1370190 |
| O  | 0,1667980 | 0,7929100 | -32,7131260 | Ca | 0,0000000 | 0,0000000 | -34,1370190 |
| O  | 0,2927890 | 0,5402500 | -32,7118470 | Ca | 0,5000000 | 0,5000000 | -34,1370190 |
| O  | 0,0402310 | 0,6668110 | -32,7115880 | O  | 0,4596340 | 0,3333330 | -35,5593940 |
| C  | 0,1666040 | 0,6666920 | -32,7116980 | C  | 0,3333330 | 0,3333330 | -35,5593940 |
| Ca | 0,4999150 | 0,5000910 | -34,1346100 | O  | 0,3333330 | 0,2070320 | -35,5593940 |
| C  | 0,6666670 | 0,1666670 | -32,7146430 | O  | 0,2070320 | 0,4596340 | -35,5593940 |
| C  | 0,3333330 | 0,3333330 | -35,5593940 | O  | 0,9596340 | 0,8333330 | -35,5593940 |
| O  | 0,3333330 | 0,2070320 | -35,5593940 | C  | 0,8333330 | 0,8333330 | -35,5593940 |
| O  | 0,2070320 | 0,4596340 | -35,5593940 | O  | 0,8333330 | 0,7070320 | -35,5593940 |
| O  | 0,4596340 | 0,3333330 | -35,5593940 | O  | 0,7070320 | 0,9596340 | -35,5593940 |
| O  | 0,6666670 | 0,2929680 | -32,7146430 | O  | 0,4596340 | 0,8333330 | -35,5593940 |
| O  | 0,7929680 | 0,0403660 | -32,7146430 | C  | 0,3333330 | 0,8333330 | -35,5593940 |
| O  | 0,5403660 | 0,1666670 | -32,7146430 | O  | 0,3333330 | 0,7070320 | -35,5593940 |
| Ca | 0,0000000 | 0,5000000 | -34,1370190 | O  | 0,2070320 | 0,9596340 | -35,5593940 |
| Ca | 0,5000000 | 0,0000000 | -34,1370190 | O  | 0,9596340 | 0,3333330 | -35,5593940 |
| Ca | 0,0000000 | 0,0000000 | -34,1370190 | C  | 0,8333330 | 0,3333330 | -35,5593940 |
| O  | 0,8333330 | 0,7070320 | -35,5593940 | O  | 0,8333330 | 0,2070320 | -35,5593940 |
| O  | 0,7070320 | 0,9596340 | -35,5593940 | O  | 0,7070320 | 0,4596340 | -35,5593940 |
| O  | 0,9596340 | 0,8333330 | -35,5593940 | Ca | 0,1666670 | 0,1666670 | -36,9817700 |
| C  | 0,8333330 | 0,8333330 | -35,5593940 | Ca | 0,6666670 | 0,6666670 | -36,9817700 |
| O  | 0,3333330 | 0,7070320 | -35,5593940 | Ca | 0,1666670 | 0,6666670 | -36,9817700 |
| O  | 0,2070320 | 0,9596340 | -35,5593940 | Ca | 0,6666670 | 0,1666670 | -36,9817700 |
| O  | 0,4596340 | 0,8333330 | -35,5593940 | O  | 0,8736990 | 0,5000000 | -38,4041460 |
| C  | 0,3333330 | 0,8333330 | -35,5593940 | O  | 0,0000000 | 0,6263010 | -38,4041460 |
| O  | 0,8333330 | 0,2070320 | -35,5593940 | O  | 0,1263010 | 0,3736990 | -38,4041460 |

|    |           |           |             |    |           |           |             |
|----|-----------|-----------|-------------|----|-----------|-----------|-------------|
| O  | 0,7070320 | 0,4596340 | -35,5593940 | C  | 0,0000000 | 0,5000000 | -38,4041460 |
| O  | 0,9596340 | 0,3333330 | -35,5593940 | O  | 0,3736990 | 0,0000000 | -38,4041460 |
| C  | 0,8333330 | 0,3333330 | -35,5593940 | O  | 0,5000000 | 0,1263010 | -38,4041460 |
| Ca | 0,1666670 | 0,1666670 | -36,9817700 | O  | 0,6263010 | 0,8736990 | -38,4041460 |
| Ca | 0,6666670 | 0,6666670 | -36,9817700 | C  | 0,5000000 | 0,0000000 | -38,4041460 |
| Ca | 0,1666670 | 0,6666670 | -36,9817700 | O  | 0,8736990 | 0,0000000 | -38,4041460 |
| Ca | 0,6666670 | 0,1666670 | -36,9817700 | O  | 0,0000000 | 0,1263010 | -38,4041460 |
| O  | 0,0000000 | 0,6263010 | -38,4041460 | O  | 0,1263010 | 0,8736990 | -38,4041460 |
| O  | 0,1263010 | 0,3736990 | -38,4041460 | C  | 0,0000000 | 0,0000000 | -38,4041460 |
| O  | 0,8736990 | 0,5000000 | -38,4041460 | O  | 0,3736990 | 0,5000000 | -38,4041460 |
| C  | 0,0000000 | 0,5000000 | -38,4041460 | O  | 0,5000000 | 0,6263010 | -38,4041460 |
| O  | 0,5000000 | 0,1263010 | -38,4041460 | O  | 0,6263010 | 0,3736990 | -38,4041460 |
| O  | 0,6263010 | 0,8736990 | -38,4041460 | C  | 0,5000000 | 0,5000000 | -38,4041460 |
| O  | 0,3736990 | 0,0000000 | -38,4041460 | Ca | 0,3333330 | 0,3333330 | -39,8265220 |
| C  | 0,5000000 | 0,0000000 | -38,4041460 | Ca | 0,8333330 | 0,8333330 | -39,8265220 |
| O  | 0,0000000 | 0,1263010 | -38,4041460 | Ca | 0,3333330 | 0,8333330 | -39,8265220 |
| O  | 0,1263010 | 0,8736990 | -38,4041460 | Ca | 0,8333330 | 0,3333330 | -39,8265220 |
| O  | 0,8736990 | 0,0000000 | -38,4041460 | O  | 0,0403660 | 0,2929680 | -41,2488970 |
| C  | 0,0000000 | 0,0000000 | -38,4041460 | C  | 0,1666670 | 0,1666670 | -41,2488970 |
| O  | 0,5000000 | 0,6263010 | -38,4041460 | O  | 0,1666670 | 0,0403660 | -41,2488970 |
| O  | 0,6263010 | 0,3736990 | -38,4041460 | O  | 0,2929680 | 0,1666670 | -41,2488970 |
| O  | 0,3736990 | 0,5000000 | -38,4041460 | O  | 0,5403660 | 0,7929680 | -41,2488970 |
| C  | 0,5000000 | 0,5000000 | -38,4041460 | C  | 0,6666670 | 0,6666670 | -41,2488970 |
| Ca | 0,3333330 | 0,3333330 | -39,8265220 | O  | 0,6666670 | 0,5403660 | -41,2488970 |
| Ca | 0,8333330 | 0,8333330 | -39,8265220 | O  | 0,7929680 | 0,6666670 | -41,2488970 |
| Ca | 0,3333330 | 0,8333330 | -39,8265220 | O  | 0,0403660 | 0,7929680 | -41,2488970 |
| Ca | 0,8333330 | 0,3333330 | -39,8265220 | C  | 0,1666670 | 0,6666670 | -41,2488970 |
| O  | 0,0403660 | 0,2929680 | -41,2488970 | O  | 0,1666670 | 0,5403660 | -41,2488970 |
| C  | 0,1666670 | 0,1666670 | -41,2488970 | O  | 0,2929680 | 0,6666670 | -41,2488970 |
| O  | 0,5403660 | 0,7929680 | -41,2488970 | O  | 0,5403660 | 0,2929680 | -41,2488970 |
| C  | 0,6666670 | 0,6666670 | -41,2488970 | C  | 0,6666670 | 0,1666670 | -41,2488970 |
| O  | 0,0403660 | 0,7929680 | -41,2488970 | O  | 0,6666670 | 0,0403660 | -41,2488970 |
| C  | 0,1666670 | 0,6666670 | -41,2488970 | O  | 0,7929680 | 0,1666670 | -41,2488970 |
| O  | 0,5403660 | 0,2929680 | -41,2488970 | Ca | 0,0000000 | 0,5000000 | -42,6712730 |
| C  | 0,6666670 | 0,1666670 | -41,2488970 | Ca | 0,5000000 | 0,0000000 | -42,6712730 |
| O  | 0,1666670 | 0,0403660 | -41,2488970 | Ca | 0,0000000 | 0,0000000 | -42,6712730 |
| O  | 0,2929680 | 0,1666670 | -41,2488970 | Ca | 0,5000000 | 0,5000000 | -42,6712730 |
| O  | 0,6666670 | 0,5403660 | -41,2488970 | O  | 0,3333330 | 0,4596340 | -44,0936490 |
| O  | 0,7929680 | 0,6666670 | -41,2488970 | O  | 0,4596340 | 0,2070320 | -44,0936490 |
| O  | 0,1666670 | 0,5403660 | -41,2488970 | O  | 0,2070320 | 0,3333330 | -44,0936490 |
| O  | 0,2929680 | 0,6666670 | -41,2488970 | C  | 0,3333330 | 0,3333330 | -44,0936490 |
| O  | 0,6666670 | 0,0403660 | -41,2488970 | O  | 0,8333330 | 0,9596340 | -44,0936490 |
| O  | 0,7929680 | 0,1666670 | -41,2488970 | O  | 0,9596340 | 0,7070320 | -44,0936490 |
| Ca | 0,0000000 | 0,5000000 | -42,6712730 | O  | 0,7070320 | 0,8333330 | -44,0936490 |
| Ca | 0,5000000 | 0,0000000 | -42,6712730 | C  | 0,8333330 | 0,8333330 | -44,0936490 |
| Ca | 0,0000000 | 0,0000000 | -42,6712730 | O  | 0,3333330 | 0,9596340 | -44,0936490 |
| Ca | 0,5000000 | 0,5000000 | -42,6712730 | O  | 0,4596340 | 0,7070320 | -44,0936490 |
| O  | 0,3333330 | 0,4596340 | -44,0936490 | O  | 0,2070320 | 0,8333330 | -44,0936490 |
| O  | 0,4596340 | 0,2070320 | -44,0936490 | C  | 0,3333330 | 0,8333330 | -44,0936490 |
| O  | 0,2070320 | 0,3333330 | -44,0936490 | O  | 0,8333330 | 0,4596340 | -44,0936490 |
| C  | 0,3333330 | 0,3333330 | -44,0936490 | O  | 0,9596340 | 0,2070320 | -44,0936490 |
| O  | 0,8333330 | 0,9596340 | -44,0936490 | O  | 0,7070320 | 0,3333330 | -44,0936490 |
| O  | 0,9596340 | 0,7070320 | -44,0936490 | C  | 0,8333330 | 0,3333330 | -44,0936490 |
| O  | 0,7070320 | 0,8333330 | -44,0936490 | Ca | 0,1666670 | 0,1666670 | -45,5160250 |
| C  | 0,8333330 | 0,8333330 | -44,0936490 | Ca | 0,6666670 | 0,6666670 | -45,5160250 |
| O  | 0,3333330 | 0,9596340 | -44,0936490 | Ca | 0,1666670 | 0,6666670 | -45,5160250 |

|    |           |           |             |    |           |           |             |
|----|-----------|-----------|-------------|----|-----------|-----------|-------------|
| O  | 0,4596340 | 0,7070320 | -44,0936490 | Ca | 0,6666670 | 0,1666670 | -45,5160250 |
| O  | 0,2070320 | 0,8333330 | -44,0936490 | O  | 0,8736990 | 0,6263010 | -46,9384000 |
| C  | 0,3333330 | 0,8333330 | -44,0936490 | O  | 0,0000000 | 0,3736990 | -46,9384000 |
| O  | 0,8333330 | 0,4596340 | -44,0936490 | O  | 0,1263010 | 0,5000000 | -46,9384000 |
| O  | 0,9596340 | 0,2070320 | -44,0936490 | C  | 0,0000000 | 0,5000000 | -46,9384000 |
| O  | 0,7070320 | 0,3333330 | -44,0936490 | O  | 0,3736990 | 0,1263010 | -46,9384000 |
| C  | 0,8333330 | 0,3333330 | -44,0936490 | O  | 0,5000000 | 0,8736990 | -46,9384000 |
| Ca | 0,1666670 | 0,1666670 | -45,5160250 | O  | 0,6263010 | 0,0000000 | -46,9384000 |
| Ca | 0,6666670 | 0,6666670 | -45,5160250 | C  | 0,5000000 | 0,0000000 | -46,9384000 |
| Ca | 0,1666670 | 0,6666670 | -45,5160250 | O  | 0,8736990 | 0,1263010 | -46,9384000 |
| Ca | 0,6666670 | 0,1666670 | -45,5160250 | O  | 0,0000000 | 0,8736990 | -46,9384000 |
| O  | 0,0000000 | 0,3736990 | -46,9384000 | O  | 0,1263010 | 0,0000000 | -46,9384000 |
| O  | 0,8736990 | 0,6263010 | -46,9384000 | C  | 0,0000000 | 0,0000000 | -46,9384000 |
| O  | 0,1263010 | 0,5000000 | -46,9384000 | O  | 0,3736990 | 0,6263010 | -46,9384000 |
| C  | 0,0000000 | 0,5000000 | -46,9384000 | O  | 0,5000000 | 0,3736990 | -46,9384000 |
| O  | 0,5000000 | 0,8736990 | -46,9384000 | O  | 0,6263010 | 0,5000000 | -46,9384000 |
| O  | 0,3736990 | 0,1263010 | -46,9384000 | C  | 0,5000000 | 0,5000000 | -46,9384000 |
| O  | 0,6263010 | 0,0000000 | -46,9384000 | Ca | 0,3333330 | 0,3333330 | -48,3607760 |
| C  | 0,5000000 | 0,0000000 | -46,9384000 | Ca | 0,8333330 | 0,8333330 | -48,3607760 |
| O  | 0,0000000 | 0,8736990 | -46,9384000 | Ca | 0,3333330 | 0,8333330 | -48,3607760 |
| O  | 0,8736990 | 0,1263010 | -46,9384000 | Ca | 0,8333330 | 0,3333330 | -48,3607760 |
| O  | 0,1263010 | 0,0000000 | -46,9384000 | O  | 0,1666670 | 0,2929680 | -49,7831520 |
| C  | 0,0000000 | 0,0000000 | -46,9384000 | O  | 0,2929680 | 0,0403660 | -49,7831520 |
| O  | 0,5000000 | 0,3736990 | -46,9384000 | O  | 0,0403660 | 0,1666670 | -49,7831520 |
| O  | 0,3736990 | 0,6263010 | -46,9384000 | C  | 0,1666670 | 0,1666670 | -49,7831520 |
| O  | 0,6263010 | 0,5000000 | -46,9384000 | O  | 0,6666670 | 0,7929680 | -49,7831520 |
| C  | 0,5000000 | 0,5000000 | -46,9384000 | O  | 0,7929680 | 0,5403660 | -49,7831520 |
| Ca | 0,3333330 | 0,3333330 | -48,3607760 | O  | 0,5403660 | 0,6666670 | -49,7831520 |
| Ca | 0,8333330 | 0,8333330 | -48,3607760 | C  | 0,6666670 | 0,6666670 | -49,7831520 |
| Ca | 0,3333330 | 0,8333330 | -48,3607760 | O  | 0,1666670 | 0,7929680 | -49,7831520 |
| Ca | 0,8333330 | 0,3333330 | -48,3607760 | O  | 0,2929680 | 0,5403660 | -49,7831520 |
| O  | 0,1666670 | 0,2929680 | -49,7831520 | O  | 0,0403660 | 0,6666670 | -49,7831520 |
| O  | 0,2929680 | 0,0403660 | -49,7831520 | C  | 0,1666670 | 0,6666670 | -49,7831520 |
| O  | 0,0403660 | 0,1666670 | -49,7831520 | O  | 0,6666670 | 0,2929680 | -49,7831520 |
| C  | 0,1666670 | 0,1666670 | -49,7831520 | O  | 0,7929680 | 0,0403660 | -49,7831520 |
| O  | 0,6666670 | 0,7929680 | -49,7831520 | O  | 0,5403660 | 0,1666670 | -49,7831520 |
| O  | 0,7929680 | 0,5403660 | -49,7831520 | C  | 0,6666670 | 0,1666670 | -49,7831520 |
| O  | 0,5403660 | 0,6666670 | -49,7831520 | Ca | 0,0000000 | 0,5000000 | -51,2055280 |
| C  | 0,6666670 | 0,6666670 | -49,7831520 | Ca | 0,5000000 | 0,0000000 | -51,2055280 |
| O  | 0,1666670 | 0,7929680 | -49,7831520 | Ca | 0,0000000 | 0,0000000 | -51,2055280 |
| O  | 0,2929680 | 0,5403660 | -49,7831520 | Ca | 0,5000000 | 0,5000000 | -51,2055280 |
| O  | 0,0403660 | 0,6666670 | -49,7831520 | O  | 0,4596340 | 0,3333330 | -52,6279040 |
| C  | 0,1666670 | 0,6666670 | -49,7831520 | C  | 0,3333330 | 0,3333330 | -52,6279040 |
| O  | 0,6666670 | 0,2929680 | -49,7831520 | O  | 0,3333330 | 0,2070320 | -52,6279040 |
| O  | 0,7929680 | 0,0403660 | -49,7831520 | O  | 0,2070320 | 0,4596340 | -52,6279040 |
| O  | 0,5403660 | 0,1666670 | -49,7831520 | O  | 0,9596340 | 0,8333330 | -52,6279040 |
| C  | 0,6666670 | 0,1666670 | -49,7831520 | C  | 0,8333330 | 0,8333330 | -52,6279040 |
| Ca | 0,0000000 | 0,5000000 | -51,2055280 | O  | 0,8333330 | 0,7070320 | -52,6279040 |
| Ca | 0,5000000 | 0,0000000 | -51,2055280 | O  | 0,7070320 | 0,9596340 | -52,6279040 |
| Ca | 0,0000000 | 0,0000000 | -51,2055280 | O  | 0,4596340 | 0,8333330 | -52,6279040 |
| Ca | 0,5000000 | 0,5000000 | -51,2055280 | C  | 0,3333330 | 0,8333330 | -52,6279040 |
| O  | 0,3333330 | 0,2070320 | -52,6279040 | O  | 0,3333330 | 0,7070320 | -52,6279040 |
| O  | 0,2070320 | 0,4596340 | -52,6279040 | O  | 0,2070320 | 0,9596340 | -52,6279040 |
| O  | 0,4596340 | 0,3333330 | -52,6279040 | O  | 0,9596340 | 0,3333330 | -52,6279040 |
| C  | 0,3333330 | 0,3333330 | -52,6279040 | C  | 0,8333330 | 0,3333330 | -52,6279040 |
| O  | 0,8333330 | 0,7070320 | -52,6279040 | O  | 0,8333330 | 0,2070320 | -52,6279040 |

|    |           |           |             |    |           |           |             |
|----|-----------|-----------|-------------|----|-----------|-----------|-------------|
| O  | 0,7070320 | 0,9596340 | -52,6279040 | O  | 0,7070320 | 0,4596340 | -52,6279040 |
| O  | 0,9596340 | 0,8333330 | -52,6279040 | Ca | 0,1666670 | 0,1666670 | -54,0502790 |
| C  | 0,8333330 | 0,8333330 | -52,6279040 | Ca | 0,6666670 | 0,6666670 | -54,0502790 |
| O  | 0,3333330 | 0,7070320 | -52,6279040 | Ca | 0,1666670 | 0,6666670 | -54,0502790 |
| O  | 0,2070320 | 0,9596340 | -52,6279040 | Ca | 0,6666670 | 0,1666670 | -54,0502790 |
| O  | 0,4596340 | 0,8333330 | -52,6279040 | O  | 0,8736990 | 0,5000000 | -55,4726550 |
| C  | 0,3333330 | 0,8333330 | -52,6279040 | O  | 0,0000000 | 0,6263010 | -55,4726550 |
| O  | 0,8333330 | 0,2070320 | -52,6279040 | O  | 0,1263010 | 0,3736990 | -55,4726550 |
| O  | 0,7070320 | 0,4596340 | -52,6279040 | C  | 0,0000000 | 0,5000000 | -55,4726550 |
| O  | 0,9596340 | 0,3333330 | -52,6279040 | O  | 0,3736990 | 0,0000000 | -55,4726550 |
| C  | 0,8333330 | 0,3333330 | -52,6279040 | O  | 0,5000000 | 0,1263010 | -55,4726550 |
| Ca | 0,1666670 | 0,1666670 | -54,0502790 | O  | 0,6263010 | 0,8736990 | -55,4726550 |
| Ca | 0,6666670 | 0,6666670 | -54,0502790 | C  | 0,5000000 | 0,0000000 | -55,4726550 |
| Ca | 0,1666670 | 0,6666670 | -54,0502790 | O  | 0,8736990 | 0,0000000 | -55,4726550 |
| Ca | 0,6666670 | 0,1666670 | -54,0502790 | O  | 0,0000000 | 0,1263010 | -55,4726550 |
| O  | 0,0000000 | 0,6263010 | -55,4726550 | O  | 0,1263010 | 0,8736990 | -55,4726550 |
| O  | 0,1263010 | 0,3736990 | -55,4726550 | C  | 0,0000000 | 0,0000000 | -55,4726550 |
| O  | 0,8736990 | 0,5000000 | -55,4726550 | O  | 0,3736990 | 0,5000000 | -55,4726550 |
| C  | 0,0000000 | 0,5000000 | -55,4726550 | O  | 0,5000000 | 0,6263010 | -55,4726550 |
| O  | 0,5000000 | 0,1263010 | -55,4726550 | O  | 0,6263010 | 0,3736990 | -55,4726550 |
| O  | 0,6263010 | 0,8736990 | -55,4726550 | C  | 0,5000000 | 0,5000000 | -55,4726550 |
| O  | 0,3736990 | 0,0000000 | -55,4726550 | Ca | 0,3333330 | 0,3333330 | -56,8950310 |
| C  | 0,5000000 | 0,0000000 | -55,4726550 | Ca | 0,8333330 | 0,8333330 | -56,8950310 |
| O  | 0,0000000 | 0,1263010 | -55,4726550 | Ca | 0,3333330 | 0,8333330 | -56,8950310 |
| O  | 0,1263010 | 0,8736990 | -55,4726550 | Ca | 0,8333330 | 0,3333330 | -56,8950310 |
| O  | 0,8736990 | 0,0000000 | -55,4726550 | O  | 0,0403660 | 0,2929680 | -58,3174070 |
| C  | 0,0000000 | 0,0000000 | -55,4726550 | C  | 0,1666670 | 0,1666670 | -58,3174070 |
| O  | 0,5000000 | 0,6263010 | -55,4726550 | O  | 0,1666670 | 0,0403660 | -58,3174070 |
| O  | 0,6263010 | 0,3736990 | -55,4726550 | O  | 0,2929680 | 0,1666670 | -58,3174070 |
| O  | 0,3736990 | 0,5000000 | -55,4726550 | O  | 0,5403660 | 0,7929680 | -58,3174070 |
| C  | 0,5000000 | 0,5000000 | -55,4726550 | C  | 0,6666670 | 0,6666670 | -58,3174070 |
| Ca | 0,3333330 | 0,3333330 | -56,8950310 | O  | 0,6666670 | 0,5403660 | -58,3174070 |
| Ca | 0,8333330 | 0,8333330 | -56,8950310 | O  | 0,7929680 | 0,6666670 | -58,3174070 |
| Ca | 0,3333330 | 0,8333330 | -56,8950310 | O  | 0,0403660 | 0,7929680 | -58,3174070 |
| Ca | 0,8333330 | 0,3333330 | -56,8950310 | C  | 0,1666670 | 0,6666670 | -58,3174070 |
| O  | 0,0403660 | 0,2929680 | -58,3174070 | O  | 0,1666670 | 0,5403660 | -58,3174070 |
| C  | 0,1666670 | 0,1666670 | -58,3174070 | O  | 0,2929680 | 0,6666670 | -58,3174070 |
| O  | 0,5403660 | 0,7929680 | -58,3174070 | O  | 0,5403660 | 0,2929680 | -58,3174070 |
| C  | 0,6666670 | 0,6666670 | -58,3174070 | C  | 0,6666670 | 0,1666670 | -58,3174070 |
| O  | 0,0403660 | 0,7929680 | -58,3174070 | O  | 0,6666670 | 0,0403660 | -58,3174070 |
| C  | 0,1666670 | 0,6666670 | -58,3174070 | O  | 0,7929680 | 0,1666670 | -58,3174070 |
| O  | 0,5403660 | 0,2929680 | -58,3174070 | Ca | 0,0000000 | 0,5000000 | -59,7397820 |
| C  | 0,6666670 | 0,1666670 | -58,3174070 | Ca | 0,5000000 | 0,0000000 | -59,7397820 |
| O  | 0,1666670 | 0,0403660 | -58,3174070 | Ca | 0,0000000 | 0,0000000 | -59,7397820 |
| O  | 0,2929680 | 0,1666670 | -58,3174070 | Ca | 0,5000000 | 0,5000000 | -59,7397820 |
| O  | 0,6666670 | 0,5403660 | -58,3174070 | O  | 0,3333330 | 0,4596340 | -61,1621580 |
| O  | 0,7929680 | 0,6666670 | -58,3174070 | O  | 0,4596340 | 0,2070320 | -61,1621580 |
| O  | 0,1666670 | 0,5403660 | -58,3174070 | O  | 0,2070320 | 0,3333330 | -61,1621580 |
| O  | 0,2929680 | 0,6666670 | -58,3174070 | C  | 0,3333330 | 0,3333330 | -61,1621580 |
| O  | 0,6666670 | 0,0403660 | -58,3174070 | O  | 0,8333330 | 0,9596340 | -61,1621580 |
| O  | 0,7929680 | 0,1666670 | -58,3174070 | O  | 0,9596340 | 0,7070320 | -61,1621580 |
| Ca | 0,0000000 | 0,5000000 | -59,7397820 | O  | 0,7070320 | 0,8333330 | -61,1621580 |
| Ca | 0,5000000 | 0,0000000 | -59,7397820 | C  | 0,8333330 | 0,8333330 | -61,1621580 |
| Ca | 0,0000000 | 0,0000000 | -59,7397820 | O  | 0,3333330 | 0,9596340 | -61,1621580 |
| Ca | 0,5000000 | 0,5000000 | -59,7397820 | O  | 0,4596340 | 0,7070320 | -61,1621580 |
| O  | 0,3333330 | 0,4596340 | -61,1621580 | O  | 0,2070320 | 0,8333330 | -61,1621580 |

|    |           |           |             |    |           |           |             |
|----|-----------|-----------|-------------|----|-----------|-----------|-------------|
| O  | 0,4596340 | 0,2070320 | -61,1621580 | C  | 0,3333330 | 0,8333330 | -61,1621580 |
| O  | 0,2070320 | 0,3333330 | -61,1621580 | O  | 0,8333330 | 0,4596340 | -61,1621580 |
| C  | 0,3333330 | 0,3333330 | -61,1621580 | O  | 0,9596340 | 0,2070320 | -61,1621580 |
| O  | 0,8333330 | 0,9596340 | -61,1621580 | O  | 0,7070320 | 0,3333330 | -61,1621580 |
| O  | 0,9596340 | 0,7070320 | -61,1621580 | C  | 0,8333330 | 0,3333330 | -61,1621580 |
| O  | 0,7070320 | 0,8333330 | -61,1621580 | Ca | 0,1666670 | 0,1666670 | -62,5845340 |
| C  | 0,8333330 | 0,8333330 | -61,1621580 | Ca | 0,6666670 | 0,6666670 | -62,5845340 |
| O  | 0,3333330 | 0,9596340 | -61,1621580 | Ca | 0,1666670 | 0,6666670 | -62,5845340 |
| O  | 0,4596340 | 0,7070320 | -61,1621580 | Ca | 0,6666670 | 0,1666670 | -62,5845340 |
| O  | 0,2070320 | 0,8333330 | -61,1621580 | O  | 0,8736990 | 0,6263010 | -64,0069100 |
| C  | 0,3333330 | 0,8333330 | -61,1621580 | O  | 0,0000000 | 0,3736990 | -64,0069100 |
| O  | 0,8333330 | 0,4596340 | -61,1621580 | O  | 0,1263010 | 0,5000000 | -64,0069100 |
| O  | 0,9596340 | 0,2070320 | -61,1621580 | C  | 0,0000000 | 0,5000000 | -64,0069100 |
| O  | 0,7070320 | 0,3333330 | -61,1621580 | O  | 0,3736990 | 0,1263010 | -64,0069100 |
| C  | 0,8333330 | 0,3333330 | -61,1621580 | O  | 0,5000000 | 0,8736990 | -64,0069100 |
| Ca | 0,1666670 | 0,1666670 | -62,5845340 | O  | 0,6263010 | 0,0000000 | -64,0069100 |
| Ca | 0,6666670 | 0,6666670 | -62,5845340 | C  | 0,5000000 | 0,0000000 | -64,0069100 |
| Ca | 0,1666670 | 0,6666670 | -62,5845340 | O  | 0,8736990 | 0,1263010 | -64,0069100 |
| Ca | 0,6666670 | 0,1666670 | -62,5845340 | O  | 0,0000000 | 0,8736990 | -64,0069100 |
| O  | 0,5000000 | 0,8736990 | -64,0069100 | O  | 0,1263010 | 0,0000000 | -64,0069100 |
| O  | 0,3736990 | 0,1263010 | -64,0069100 | C  | 0,0000000 | 0,0000000 | -64,0069100 |
| O  | 0,6263010 | 0,0000000 | -64,0069100 | O  | 0,3736990 | 0,6263010 | -64,0069100 |
| C  | 0,5000000 | 0,0000000 | -64,0069100 | O  | 0,5000000 | 0,3736990 | -64,0069100 |
| O  | 0,0000000 | 0,8736990 | -64,0069100 | O  | 0,6263010 | 0,5000000 | -64,0069100 |
| O  | 0,8736990 | 0,1263010 | -64,0069100 | C  | 0,5000000 | 0,5000000 | -64,0069100 |
| O  | 0,1263010 | 0,0000000 | -64,0069100 | Ca | 0,8333330 | 0,8333330 | -65,4292850 |
| C  | 0,0000000 | 0,0000000 | -64,0069100 | Ca | 0,3333330 | 0,8333330 | -65,4292850 |
| O  | 0,5000000 | 0,3736990 | -64,0069100 | Ca | 0,8333330 | 0,3333330 | -65,4292850 |
| O  | 0,3736990 | 0,6263010 | -64,0069100 | O  | 0,6666670 | 0,7929680 | -66,8516610 |
| O  | 0,6263010 | 0,5000000 | -64,0069100 | O  | 0,7929680 | 0,5403660 | -66,8516610 |
| C  | 0,5000000 | 0,5000000 | -64,0069100 | O  | 0,5403660 | 0,6666670 | -66,8516610 |
| Ca | 0,3333330 | 0,8333330 | -65,4292850 | C  | 0,6666670 | 0,6666670 | -66,8516610 |
